# Supplementary material for: Impact of isolation method on doubling time and the quality of chondrocyte and osteoblast differentiated from murine dental pulp stem cells
Source: PeerJ. 2017 Jun 14;5:e3180. doi: 10.7717/peerj.3180 (PMC5473353; doi:10.7717/peerj.3180)
Supplement: Data S2 [file peerj-05-3180-s002.xlsx]

## Sheet: Assay n1
BRADFORD															sGAG
READING	Absorbance 450														READING	Absorbance 655
	Day	CM + Cell			CM + DF + Cell			BRADFORD + ddi	ddi							Day	CM + Cell		CM + DF + Cell
	0	0.305	0.316	0.306	0.317	0.323	0.326	0.312	0.031							0	0.078	0.077	0.065	0.063
	3	0.293	0.302	0.295	0.311	0.316	0.314	0.31	0.028							3	0.066	0.065	0.068	0.069
	6	0.315	0.316	0.311	0.316	0.32	0.322	0.308	0.031							6	0.102	0.1	0.104	0.102
	9	0.297	0.302	0.301	0.31	0.316	0.317		0.03							9	0.102	0.102	0.135	0.134
	12	0.315	0.315	0.313	0.316	0.321	0.322									12	0.121	0.118	0.178	0.177
	15	0.303	0.308	0.303	0.311	0.321	0.319									15	0.121	0.121	0.203	0.207
	18	0.346	0.348	0.329	0.333	0.338	0.337									18	0.171	0.169	0.163	0.161
	21	0.311	0.309	0.311	0.309	0.317	0.323									21	0.144	0.146	0.244	0.245
	Absorbance 595														Diluted protein concentration (y=.4904x)		Replicate 1		Replicate 2		Replicate 1		Replicate 2
	Day	CM + Cell			CM + DF + Cell			BRADFORD + ddi	ddi							Day	CM + Cell	Dilution	CM + Cell	Dilution	CM + DF + Cell	Dilution	CM + DF + Cell	Dilution
	0	0.201	0.207	0.207	0.212	0.216	0.221	0.181	0.03						y=0.1125x + 0.0556	0	0.199111	2.5	0.190222	2.5	0.0835556	2.5	0.0657778	2.5
	3	0.199	0.203	0.201	0.208	0.216	0.214	0.183	0.032							3	0.0924444	2.5	0.0835556	2.5	0.110222	2.5	0.119111	2.5
	6	0.217	0.214	0.211	0.212	0.216	0.22	0.18	0.03							6	0.412444	2.5	0.394667	2.5	0.430222	2.5	0.412444	2.5
	9	0.199	0.202	0.204	0.207	0.213	0.216		0.0306667							9	0.412444	2.5	0.412444	2.5	0.705778	2.5	0.696889	2.5
	12	0.213	0.212	0.215	0.213	0.219	0.221									12	0.581333	2.5	0.554667	2.5	1.088	2.5	1.07911	2.5
	15	0.205	0.209	0.205	0.211	0.216	0.219									15	0.581333	2.5	0.581333	2.5	1.31022	2.5	1.34578	2.5
	18	0.238	0.237	0.224	0.225	0.231	0.234									18	1.02578	2.5	1.008	2.5	0.954667	5	0.936889	5
	21	0.195	0.183	0.201	0.212	0.218	0.22									21	0.785778	2.5	0.803556	2.5	1.67467	5	1.68356	5
minus blank ddi	Absorbance 450														Actual sGAG amount per well		CM + Cell		CM + DF + Cell
	Day	CM + Cell			CM + DF + Cell			BRADFORD + buffer	bradford							Day	1	2	1	2
	0	0.275	0.286	0.276	0.287	0.293	0.296	0.282	0.001							0	0.497778	0.475556	0.208889	0.164444
	3	0.263	0.272	0.265	0.281	0.286	0.284	0.28	-0.002							3	0.231111	0.208889	0.275556	0.297778
	6	0.285	0.286	0.281	0.286	0.29	0.292	0.278	0.001							6	1.03111	0.986667	1.07556	1.03111
	9	0.267	0.272	0.271	0.28	0.286	0.287									9	1.03111	1.03111	1.76444	1.74222
	12	0.285	0.285	0.283	0.286	0.291	0.292									12	1.45333	1.38667	2.72	2.69778
	15	0.273	0.278	0.273	0.281	0.291	0.289									15	1.45333	1.45333	3.27556	3.36444
	18	0.316	0.318	0.299	0.303	0.308	0.307									18	2.56444	2.52	4.77333	4.68444
	21	0.281	0.279	0.281	0.279	0.287	0.293									21	1.96444	2.00889	8.37333	8.41778
	Absorbance 595														Average sGAG amount per well		Average
	Day	CM + Cell			CM + DF + Cell			BRADFORD + buffer	bradford							Day	CM + Cell	CM + DF + Cell
	0	0.170333	0.176333	0.176333	0.181333	0.185333	0.190333	0.150333	-0.000666667							0	0.486667	0.186667
	3	0.168333	0.172333	0.170333	0.177333	0.185333	0.183333	0.152333	0.00133333							3	0.22	0.286667
	6	0.186333	0.183333	0.180333	0.181333	0.185333	0.189333	0.149333	-0.000666667							6	1.00889	1.05333
	9	0.168333	0.171333	0.173333	0.176333	0.182333	0.185333									9	1.03111	1.75333
	12	0.182333	0.181333	0.184333	0.182333	0.188333	0.190333									12	1.42	2.70889
	15	0.174333	0.178333	0.174333	0.180333	0.185333	0.188333									15	1.45333	3.32
	18	0.207333	0.206333	0.193333	0.194333	0.200333	0.203333									18	2.54222	4.72889
	21	0.164333	0.152333	0.170333	0.181333	0.187333	0.189333									21	1.98667	8.39556
595/450	Day	CM + Cell			CM + DF + Cell			BRADFORD + ddi	bradford
	0	0.619394	0.61655	0.638889	0.631823	0.632537	0.643018	0.533097	-0.666667
	3	0.640051	0.633578	0.642767	0.631079	0.648019	0.64554	0.544048	-0.666667
	6	0.653801	0.641026	0.641756	0.634033	0.63908	0.648402	0.53717	-0.666667
	9	0.630462	0.629902	0.639606	0.629762	0.637529	0.645761
	12	0.639766	0.636257	0.651355	0.637529	0.647194	0.651826
	15	0.638584	0.641487	0.638584	0.641756	0.636884	0.651672
	18	0.656118	0.648847	0.6466	0.641364	0.650433	0.662324
	21	0.584816	0.545998	0.606168	0.64994	0.652729	0.646189
Actual protein amount, µg (y=0.4293x+0.4051)	Day	CM + Cell			CM + DF + Cell			BRADFORD + ddi	*refer BSA standard curve
	0	0.499171	0.492546	0.544582	0.528124	0.529786	0.5542	0.298153
	3	0.547288	0.532212	0.553616	0.526391	0.565848	0.560074	0.323661
	6	0.579318	0.549559	0.551259	0.53327	0.545028	0.566741	0.307641
	9	0.524952	0.523648	0.546253	0.523321	0.541414	0.560589	0.309818	Average bradford + PER
	12	0.546625	0.538452	0.573619	0.541414	0.563926	0.574718
	15	0.543871	0.550633	0.543871	0.551259	0.539912	0.574359
	18	0.584715	0.567778	0.562543	0.550347	0.571472	0.59917
	21	0.418626	0.328203	0.468363	0.570324	0.576821	0.561586
Actual protein amount, µg (minus Bradford + PER)	Day	CM + Cell			CM + DF + Cell
	0	0.189352	0.182728	0.234763	0.218305	0.219967	0.244382
	3	0.23747	0.222393	0.243798	0.216572	0.25603	0.250256
	6	0.2695	0.239741	0.241441	0.223451	0.23521	0.256923
	9	0.215134	0.21383	0.236435	0.213503	0.231596	0.250771
	12	0.236807	0.228634	0.263801	0.231596	0.254108	0.2649
	15	0.234052	0.240815	0.234052	0.241441	0.230094	0.264541
	18	0.274897	0.25796	0.252725	0.240529	0.261654	0.289352
	21	0.108808	0.018385	0.158545	0.260506	0.267003	0.251768
Actual amount of protein per well, µg	Day	CM + Cell						CM + DF + Cell
		Reading1	Dilution1	Reading2	Dilution2	Reading3	Dilution3	Reading1	Dilution1	Reading2	Dilution2	Reading3	Dilution3
	0	62.3963	125	61.5683	125	68.0727	125	66.0154	125	66.2232	125	69.275	125
	3	68.411	125	66.5264	125	69.202	125	65.7988	125	70.731	125	70.0093	125
	6	72.4147	125	68.6949	125	68.9074	125	66.6587	125	68.1285	125	70.8426	125
	9	65.619	125	65.456	125	68.2816	125	65.4152	125	67.6768	125	70.0736	125
	12	68.3281	125	67.3065	125	71.7023	125	67.6768	125	70.4908	125	71.8398	125
	15	67.9838	125	68.8291	125	67.9838	125	68.9074	125	67.489	125	71.7949	125
	18	73.0894	125	70.9722	125	70.3179	125	68.7934	125	71.434	125	74.8962	125
	21	52.3282	125	41.0254	125	58.5454	125	71.2905	125	72.1027	125	70.1982	125
		Cell			Cell + DF
Actual protein amount, µg to mg	Day	1	2	3	1	2	3
	0	0.0623963	0.0615683	0.0680727	0.0660154	0.0662232	0.069275
	3	0.068411	0.0665264	0.069202	0.0657988	0.070731	0.0700093
	6	0.0724147	0.0686949	0.0689074	0.0666587	0.0681285	0.0708426
	9	0.065619	0.065456	0.0682816	0.0654152	0.0676768	0.0700736
	12	0.0683281	0.0673065	0.0717023	0.0676768	0.0704908	0.0718398
	15	0.0679838	0.0688291	0.0679838	0.0689074	0.067489	0.0717949
	18	0.0730894	0.0709722	0.0703179	0.0687934	0.071434	0.0748962
	21	0.0523282	0.0410254	0.0585454	0.0712905	0.0721027	0.0701982
		Average
Average protein per well, mg	Day	Cell	Cell + DF
	0	0.0640124	0.0671712
	3	0.0680465	0.0688464
	6	0.0700057	0.0685433
	9	0.0664522	0.0677219
	12	0.0691123	0.0700024
	15	0.0682656	0.0693971
	18	0.0714598	0.0717079
	21	0.050633	0.0711972
		Average
sGAG/mg protein	Day	Cell	Cell + DF
	0	7.60269	2.77897
	3	3.23308	4.16386
	6	14.4115	15.3674
	9	15.5166	25.8902
	12	20.5463	38.6971
	15	21.2894	47.8406
	18	35.5755	65.9466
	21	39.2366	117.92

## Sheet: Assay n2
BRADFORD															sGAG
READING	Absorbance 450														READING	Absorbance 655
	Day	CM + Cell			CM + DF + Cell			BRADFORD + ddi	ddi							Day	CM + Cell		CM + DF + Cell
	0	0.304	0.302	0.303	0.325	0.325	0.327	0.312	0.031							0	0.072	0.071	0.067	0.067
	3	0.3	0.286	0.296	0.317	0.312	0.314	0.31	0.028							3	0.073	0.072	0.068	0.068
	6	0.311	0.305	0.302	0.322	0.322	0.322	0.308	0.031							6	0.098	0.099	0.1	0.098
	9	0.301	0.301	0.303	0.322	0.319	0.32		0.03							9	0.101	0.1	0.144	0.143
	12	0.309	0.305	0.306	0.328	0.323	0.324									12	0.111	0.109	0.162	0.161
	15	0.306	0.303	0.297	0.323	0.319	0.32									15	0.157	0.157	0.125	0.124
	18	0.329	0.319	0.315	0.337	0.326	0.332									18	0.173	0.176	0.142	0.141
	21	0.307	0.305	0.298	0.324	0.323	0.318									21	0.159	0.161	0.206	0.203
	Absorbance 595														Diluted protein concentration (y=.4904x)		Replicate 1		Replicate 2		Replicate 1		Replicate 2
	Day	CM + Cell			CM + DF + Cell			BRADFORD + ddi	ddi							Day	CM + Cell	Dilution	CM + Cell	Dilution	CM + DF + Cell	Dilution	CM + DF + Cell	Dilution
	0	0.202	0.196	0.202	0.214	0.216	0.213	0.181	0.03						y=0.1125x + 0.0556	0	0.145778	2.5	0.136889	2.5	0.101333	2.5	0.101333	2.5
	3	0.2	0.191	0.193	0.21	0.201	0.213	0.183	0.032							3	0.154667	2.5	0.145778	2.5	0.110222	2.5	0.110222	2.5
	6	0.206	0.205	0.202	0.217	0.216	0.215	0.18	0.03							6	0.376889	2.5	0.385778	2.5	0.394667	2.5	0.376889	2.5
	9	0.201	0.201	0.201	0.215	0.214	0.216		0.0306667							9	0.403556	2.5	0.394667	2.5	0.785778	2.5	0.776889	2.5
	12	0.206	0.206	0.202	0.219	0.218	0.216									12	0.492444	2.5	0.474667	2.5	0.945778	2.5	0.936889	2.5
	15	0.19	0.198	0.194	0.218	0.216	0.218									15	0.901333	2.5	0.901333	2.5	0.616889	5	0.608	5
	18	0.224	0.216	0.216	0.226	0.222	0.227									18	1.04356	2.5	1.07022	2.5	0.768	5	0.759111	5
	21	0.202	0.192	0.192	0.213	0.213	0.213									21	0.919111	2.5	0.936889	2.5	1.33689	5	1.31022	5
minus blank ddi	Absorbance 450														Actual sGAG amount per well		CM + Cell		CM + DF + Cell
	Day	CM + Cell			CM + DF + Cell			BRADFORD + buffer	bradford							Day	1	2	1	2
	0	0.274	0.272	0.273	0.295	0.295	0.297	0.282	0.001							0	0.364444	0.342222	0.253333	0.253333
	3	0.27	0.256	0.266	0.287	0.282	0.284	0.28	-0.002							3	0.386667	0.364444	0.275556	0.275556
	6	0.281	0.275	0.272	0.292	0.292	0.292	0.278	0.001							6	0.942222	0.964444	0.986667	0.942222
	9	0.271	0.271	0.273	0.292	0.289	0.29									9	1.00889	0.986667	1.96444	1.94222
	12	0.279	0.275	0.276	0.298	0.293	0.294									12	1.23111	1.18667	2.36444	2.34222
	15	0.276	0.273	0.267	0.293	0.289	0.29									15	2.25333	2.25333	3.08444	3.04
	18	0.299	0.289	0.285	0.307	0.296	0.302									18	2.60889	2.67556	3.84	3.79556
	21	0.277	0.275	0.268	0.294	0.293	0.288									21	2.29778	2.34222	6.68444	6.55111
	Absorbance 595														Average sGAG amount per well		Average
	Day	CM + Cell			CM + DF + Cell			BRADFORD + buffer	bradford							Day	CM + Cell	CM + DF + Cell
	0	0.171333	0.165333	0.171333	0.183333	0.185333	0.182333	0.150333	-0.000666667							0	0.353333	0.253333
	3	0.169333	0.160333	0.162333	0.179333	0.170333	0.182333	0.152333	0.00133333							3	0.375556	0.275556
	6	0.175333	0.174333	0.171333	0.186333	0.185333	0.184333	0.149333	-0.000666667							6	0.953333	0.964444
	9	0.170333	0.170333	0.170333	0.184333	0.183333	0.185333									9	0.997778	1.95333
	12	0.175333	0.175333	0.171333	0.188333	0.187333	0.185333									12	1.20889	2.35333
	15	0.159333	0.167333	0.163333	0.187333	0.185333	0.187333									15	2.25333	3.06222
	18	0.193333	0.185333	0.185333	0.195333	0.191333	0.196333									18	2.64222	3.81778
	21	0.171333	0.161333	0.161333	0.182333	0.182333	0.182333									21	2.32	6.61778
595/450	Day	CM + Cell			CM + DF + Cell			BRADFORD + ddi	bradford
	0	0.625304	0.607843	0.627595	0.621469	0.628249	0.613917	0.533097	-0.666667
	3	0.62716	0.626302	0.610276	0.624855	0.604019	0.642019	0.544048	-0.666667
	6	0.623962	0.633939	0.629902	0.638128	0.634703	0.631279	0.53717	-0.666667
	9	0.628536	0.628536	0.623932	0.631279	0.634371	0.63908
	12	0.628435	0.637576	0.620773	0.631991	0.639363	0.630385
	15	0.577295	0.612943	0.611735	0.639363	0.641292	0.645977
	18	0.6466	0.641292	0.650292	0.636265	0.646396	0.65011
	21	0.618532	0.586667	0.60199	0.620181	0.622298	0.633102
Actual protein amount, µg (y=0.4293x+0.4051)	Day	CM + Cell			CM + DF + Cell			BRADFORD + ddi	*refer BSA standard curve
	0	0.512938	0.472264	0.518273	0.504004	0.519796	0.486413	0.298153
	3	0.517262	0.515262	0.477931	0.511891	0.463356	0.551872	0.323661
	6	0.509811	0.533052	0.523648	0.542809	0.534832	0.526854	0.307641
	9	0.520467	0.520467	0.509741	0.526854	0.534059	0.545028	0.309818	Average bradford + PER
	12	0.52023	0.541523	0.502383	0.528514	0.545686	0.524774
	15	0.401106	0.484143	0.481331	0.545686	0.550179	0.561093
	18	0.562543	0.550179	0.571145	0.538469	0.562069	0.570721
	21	0.497163	0.422937	0.45863	0.501005	0.505935	0.531101
Actual protein amount, µg (minus Bradford + PER)	Day	CM + Cell			CM + DF + Cell
	0	0.203119	0.162446	0.208455	0.194186	0.209978	0.176594
	3	0.207444	0.205444	0.168113	0.202073	0.153538	0.242054
	6	0.199993	0.223234	0.21383	0.232991	0.225013	0.217036
	9	0.210648	0.210648	0.199922	0.217036	0.224241	0.23521
	12	0.210412	0.231705	0.192565	0.218696	0.235868	0.214956
	15	0.0912876	0.174325	0.171513	0.235868	0.240361	0.251274
	18	0.252725	0.240361	0.261326	0.228651	0.252251	0.260902
	21	0.187344	0.113118	0.148812	0.191187	0.196117	0.221283
Actual amount of protein per well, µg	Day	CM + Cell						CM + DF + Cell
		Reading1	Dilution1	Reading2	Dilution2	Reading3	Dilution3	Reading1	Dilution1	Reading2	Dilution2	Reading3	Dilution3
	0	64.1172	125	59.0331	125	64.7841	125	63.0005	125	64.9745	125	60.8016	125
	3	64.6577	125	64.4078	125	59.7413	125	63.9864	125	57.9196	125	68.984	125
	6	63.7264	125	66.6315	125	65.456	125	67.8511	125	66.8539	125	65.8568	125
	9	65.0583	125	65.0583	125	63.7176	125	65.8568	125	66.7573	125	68.1285	125
	12	65.0288	125	67.6904	125	62.7979	125	66.0642	125	68.2107	125	65.5968	125
	15	50.1382	125	60.5179	125	60.1664	125	68.2107	125	68.7724	125	70.1366	125
	18	70.3179	125	68.7724	125	71.3931	125	67.3087	125	70.2587	125	71.3401	125
	21	62.1453	125	52.8671	125	57.3288	125	62.6256	125	63.2419	125	66.3877	125
		Cell			Cell + DF
Actual protein amount, µg to mg	Day	1	2	3	1	2	3
	0	0.0641172	0.0590331	0.0647841	0.0630005	0.0649745	0.0608016
	3	0.0646577	0.0644078	0.0597413	0.0639864	0.0579196	0.068984
	6	0.0637264	0.0666315	0.065456	0.0678511	0.0668539	0.0658568
	9	0.0650583	0.0650583	0.0637176	0.0658568	0.0667573	0.0681285
	12	0.0650288	0.0676904	0.0627979	0.0660642	0.0682107	0.0655968
	15	0.0501382	0.0605179	0.0601664	0.0682107	0.0687724	0.0701366
	18	0.0703179	0.0687724	0.0713931	0.0673087	0.0702587	0.0713401
	21	0.0621453	0.0528671	0.0573288	0.0626256	0.0632419	0.0663877
		Average
Average protein per well, mg	Day	Cell	Cell + DF
	0	0.0626448	0.0629255
	3	0.0629356	0.06363
	6	0.0652713	0.0668539
	9	0.0646114	0.0669142
	12	0.0651723	0.0666239
	15	0.0569408	0.0690399
	18	0.0701611	0.0696358
	21	0.0574471	0.0640851
		Average
sGAG/mg protein	Day	Cell	Cell + DF
	0	5.64027	4.02592
	3	5.9673	4.33059
	6	14.6057	14.4261
	9	15.4428	29.1916
	12	18.5491	35.3227
	15	39.5733	44.3544
	18	37.6594	54.8249
	21	40.385	103.266

## Sheet: Assay n3
BRADFORD															sGAG
READING	Absorbance 450														READING	Absorbance 655
	Day	CM + Cell			CM + DF + Cell			BRADFORD + ddi	ddi							Day	CM + Cell		CM + DF + Cell
	0	0.297	0.302	0.298	0.319	0.327	0.32	0.312	0.031							0	0.066	0.066	0.063	0.063
	3	0.287	0.289	0.288	0.31	0.312	0.307	0.31	0.028							3	0.069	0.075	0.079	0.084
	6	0.29	0.296	0.297	0.319	0.314	0.322	0.308	0.031							6	0.11	0.109	0.082	0.082
	9	0.293	0.299	0.295	0.318	0.315	0.314		0.03							9	0.126	0.126	0.182	0.182
	12	0.299	0.302	0.299	0.319	0.313	0.318									12	0.1	0.099	0.187	0.188
	15	0.297	0.298	0.293	0.32	0.308	0.313									15	0.111	0.111	0.21	0.208
	18	0.307	0.303	0.29	0.326	0.328	0.322									18	0.162	0.161	0.233	0.233
	21	0.294	0.296	0.292	0.315	0.311	0.316									21	0.188	0.188	0.214	0.215
	Absorbance 595														Diluted protein concentration (y=.4904x)		Replicate 1		Replicate 2		Replicate 1		Replicate 2
	Day	CM + Cell			CM + DF + Cell			BRADFORD + ddi	ddi							Day	CM + Cell	Dilution	CM + Cell	Dilution	CM + DF + Cell	Dilution	CM + DF + Cell	Dilution
	0	0.2	0.202	0.197	0.208	0.213	0.209	0.181	0.03						y=0.1125x + 0.0556	0	0.0924444	2.5	0.0924444	2.5	0.0657778	2.5	0.0657778	2.5
	3	0.193	0.194	0.191	0.205	0.21	0.207	0.183	0.032							3	0.119111	2.5	0.172444	2.5	0.208	2.5	0.252444	2.5
	6	0.199	0.201	0.197	0.216	0.215	0.219	0.18	0.03							6	0.483556	2.5	0.474667	2.5	0.234667	2.5	0.234667	2.5
	9	0.193	0.199	0.194	0.2	0.213	0.212		0.0306667							9	0.625778	2.5	0.625778	2.5	1.12356	2.5	1.12356	2.5
	12	0.202	0.204	0.197	0.212	0.213	0.216									12	0.394667	2.5	0.385778	2.5	1.168	2.5	1.17689	2.5
	15	0.194	0.199	0.195	0.213	0.208	0.213									15	0.492444	2.5	0.492444	2.5	1.37244	2.5	1.35467	2.5
	18	0.214	0.206	0.199	0.223	0.223	0.218									18	0.945778	2.5	0.936889	2.5	1.57689	2.5	1.57689	2.5
	21	0.194	0.198	0.193	0.214	0.212	0.216									21	1.17689	2.5	1.17689	2.5	1.408	5	1.41689	5
minus blank ddi	Absorbance 450														Actual sGAG amount per well		CM + Cell		CM + DF + Cell
	Day	CM + Cell			CM + DF + Cell			BRADFORD + buffer	bradford							Day	1	2	1	2
	0	0.267	0.272	0.268	0.289	0.297	0.29	0.282	0.001							0	0.231111	0.231111	0.164444	0.164444
	3	0.257	0.259	0.258	0.28	0.282	0.277	0.28	-0.002							3	0.297778	0.431111	0.52	0.631111
	6	0.26	0.266	0.267	0.289	0.284	0.292	0.278	0.001							6	1.20889	1.18667	0.586667	0.586667
	9	0.263	0.269	0.265	0.288	0.285	0.284									9	1.56444	1.56444	2.80889	2.80889
	12	0.269	0.272	0.269	0.289	0.283	0.288									12	0.986667	0.964444	2.92	2.94222
	15	0.267	0.268	0.263	0.29	0.278	0.283									15	1.23111	1.23111	3.43111	3.38667
	18	0.277	0.273	0.26	0.296	0.298	0.292									18	2.36444	2.34222	3.94222	3.94222
	21	0.264	0.266	0.262	0.285	0.281	0.286									21	2.94222	2.94222	7.04	7.08444
	Absorbance 595														Average sGAG amount per well		Average
	Day	CM + Cell			CM + DF + Cell			BRADFORD + buffer	bradford							Day	CM + Cell	CM + DF + Cell
	0	0.169333	0.171333	0.166333	0.177333	0.182333	0.178333	0.150333	-0.000666667							0	0.231111	0.164444
	3	0.162333	0.163333	0.160333	0.174333	0.179333	0.176333	0.152333	0.00133333							3	0.364444	0.575556
	6	0.168333	0.170333	0.166333	0.185333	0.184333	0.188333	0.149333	-0.000666667							6	1.19778	0.586667
	9	0.162333	0.168333	0.163333	0.169333	0.182333	0.181333									9	1.56444	2.80889
	12	0.171333	0.173333	0.166333	0.181333	0.182333	0.185333									12	0.975556	2.93111
	15	0.163333	0.168333	0.164333	0.182333	0.177333	0.182333									15	1.23111	3.40889
	18	0.183333	0.175333	0.168333	0.192333	0.192333	0.187333									18	2.35333	3.94222
	21	0.163333	0.167333	0.162333	0.183333	0.181333	0.185333									21	2.94222	7.06222
595/450	Day	CM + Cell			CM + DF + Cell			BRADFORD + ddi	bradford
	0	0.634207	0.629902	0.620647	0.61361	0.613917	0.614943	0.533097	-0.666667
	3	0.631647	0.630631	0.621447	0.622619	0.635934	0.636582	0.544048	-0.666667
	6	0.647436	0.640351	0.622971	0.641292	0.649061	0.644977	0.53717	-0.666667
	9	0.617237	0.625774	0.616352	0.587963	0.639766	0.638498
	12	0.636927	0.637255	0.61834	0.627451	0.644287	0.643519
	15	0.611735	0.628109	0.624842	0.628736	0.63789	0.644287
	18	0.661853	0.642247	0.647436	0.649775	0.645414	0.641553
	21	0.618687	0.629073	0.619593	0.643275	0.645314	0.648019
Actual protein amount, µg (y=0.4293x+0.4051)	Day	CM + Cell			CM + DF + Cell			BRADFORD + ddi	*refer BSA standard curve
	0	0.533676	0.523648	0.502089	0.485698	0.486413	0.488802	0.298153
	3	0.527713	0.525345	0.503953	0.506683	0.537698	0.539209	0.323661
	6	0.564491	0.547987	0.507504	0.550179	0.568276	0.558763	0.307641
	9	0.494146	0.514033	0.492085	0.425956	0.546625	0.54367	0.309818	Average bradford + PER
	12	0.540011	0.540775	0.496714	0.517938	0.557157	0.555366
	15	0.481331	0.519472	0.51186	0.520931	0.542254	0.557157
	18	0.598074	0.552403	0.564491	0.569939	0.559781	0.550786
	21	0.497524	0.521716	0.499634	0.554798	0.559549	0.565848
Actual protein amount, µg (minus Bradford + PER)	Day	CM + Cell			CM + DF + Cell
	0	0.223858	0.21383	0.192271	0.17588	0.176594	0.178983
	3	0.217895	0.215527	0.194135	0.196865	0.22788	0.229391
	6	0.254673	0.238169	0.197685	0.240361	0.258458	0.248945
	9	0.184328	0.204215	0.182267	0.116138	0.236807	0.233852
	12	0.230193	0.230957	0.186896	0.20812	0.247339	0.245548
	15	0.171513	0.209654	0.202042	0.211113	0.232436	0.247339
	18	0.288256	0.242585	0.254673	0.260121	0.249963	0.240968
	21	0.187705	0.211898	0.189816	0.24498	0.249731	0.25603
Actual amount of protein per well, µg	Day	CM + Cell						CM + DF + Cell
		Reading1	Dilution1	Reading2	Dilution2	Reading3	Dilution3	Reading1	Dilution1	Reading2	Dilution2	Reading3	Dilution3
	0	66.7095	125	65.456	125	62.7611	125	60.7122	125	60.8016	125	61.1002	125
	3	65.9641	125	65.6681	125	62.9941	125	63.3354	125	67.2123	125	67.4011	125
	6	70.5613	125	68.4984	125	63.4379	125	68.7724	125	71.0345	125	69.8454	125
	9	61.7683	125	64.2542	125	61.5107	125	53.2445	125	68.3281	125	67.9588	125
	12	67.5014	125	67.5969	125	62.0893	125	64.7423	125	69.6446	125	69.4207	125
	15	60.1664	125	64.934	125	63.9825	125	65.1164	125	67.7818	125	69.6446	125
	18	74.7593	125	69.0504	125	70.5613	125	71.2424	125	69.9726	125	68.8483	125
	21	62.1904	125	65.2145	125	62.4542	125	69.3498	125	69.9436	125	70.731	125
		Cell			Cell + DF
Actual protein amount, µg to mg	Day	1	2	3	1	2	3
	0	0.0667095	0.065456	0.0627611	0.0607122	0.0608016	0.0611002
	3	0.0659641	0.0656681	0.0629941	0.0633354	0.0672123	0.0674011
	6	0.0705613	0.0684984	0.0634379	0.0687724	0.0710345	0.0698454
	9	0.0617683	0.0642542	0.0615107	0.0532445	0.0683281	0.0679588
	12	0.0675014	0.0675969	0.0620893	0.0647423	0.0696446	0.0694207
	15	0.0601664	0.064934	0.0639825	0.0651164	0.0677818	0.0696446
	18	0.0747593	0.0690504	0.0705613	0.0712424	0.0699726	0.0688483
	21	0.0621904	0.0652145	0.0624542	0.0693498	0.0699436	0.070731
		Average
Average protein per well, mg	Day	Cell	Cell + DF
	0	0.0649755	0.0608713
	3	0.0648755	0.0659829
	6	0.0674992	0.0698841
	9	0.062511	0.0631771
	12	0.0657292	0.0679359
	15	0.0630276	0.0675142
	18	0.071457	0.0700211
	21	0.0632864	0.0700081
		Average
sGAG/mg protein	Day	Cell	Cell + DF
	0	3.55689	2.70151
	3	5.6176	8.7228
	6	17.7451	8.39485
	9	25.0267	44.4605
	12	14.842	43.1453
	15	19.5329	50.4914
	18	32.9336	56.3005
	21	46.4906	100.877

## Sheet: AVERAGE
		N1	N2	N3	N1	N2	N3
sGAG/mg protein	Day	Cell			DF + Cell
	0	7.60269	5.64027	3.55689	2.77897	4.02592	2.70151
	3	3.23308	5.9673	5.6176	4.16386	4.33059	8.7228
	6	14.4115	14.6057	17.7451	15.3674	14.4261	8.39485
	9	15.5166	15.4428	25.0267	25.8902	29.1916	44.4605
	12	20.5463	18.5491	14.842	38.6971	35.3227	43.1453
	15	21.2894	39.5733	19.5329	47.8406	44.3544	50.4914
	18	35.5755	37.6594	32.9336	65.9466	54.8249	56.3005
	21	39.2366	40.385	46.4906	117.92	103.266	100.877
Average	Day	Cell	STD	DF + Cell	STD	t.TEST	Annotation
	0	5.59995	2.0232	3.1688	0.7433	0.0918197
	3	4.93933	1.48796	5.73908	2.58532	0.309275
	6	15.5874	1.87108	12.7295	3.78328	0.236714
	9	18.662	5.5121	33.1808	9.90703	0.0157959
	12	17.9791	2.89451	39.055	3.92357	0.0142446	*
	15	26.7985	11.0981	47.5621	3.07797	0.062103	*
	18	35.3895	2.36838	59.024	6.04035	0.0125361	*
	21	42.0374	3.8991	107.354	9.22772	0.00583558	*
