# Supplementary material for: Impact of isolation method on doubling time and the quality of chondrocyte and osteoblast differentiated from murine dental pulp stem cells
Source: PeerJ. 2017 Jun 14;5:e3180. doi: 10.7717/peerj.3180 (PMC5473353; doi:10.7717/peerj.3180)
Supplement: Data S3 [file peerj-05-3180-s003.xlsx]

## Sheet: Assay n1
BRADFORD															sGAG
READING	Absorbance 450														READING	Absorbance 655
	Day	CM + Cell			CM + DF + Cell			BRADFORD + ddi	ddi							Day	CM + Cell		CM + DF + Cell
	0	0.318	0.328	0.329	0.289	0.298	0.295	0.312	0.031							0	0.096	0.096	0.092	0.091
	3	0.313	0.32	0.321	0.279	0.291	0.289	0.31	0.028							3	0.092	0.092	0.092	0.095
	6	0.321	0.337	0.328	0.298	0.304	0.298	0.308	0.031							6	0.135	0.135	0.134	0.132
	9	0.313	0.32	0.323	0.286	0.288	0.291		0.03							9	0.185	0.188	0.226	0.225
	12	0.324	0.334	0.333	0.304	0.302	0.298									12	0.097	0.095	0.303	0.304
	15	0.314	0.326	0.328	0.292	0.294	0.29									15	0.088	0.089	0.352	0.356
	18	0.336	0.349	0.34	0.326	0.328	0.312									18	0.163	0.156	0.378	0.376
	21	0.32	0.325	0.332	0.297	0.297	0.287									21	0.143	0.144	0.327	0.331
	Absorbance 595														Diluted protein concentration (y=.4904x)		Replicate 1		Replicate 2		Replicate 1		Replicate 2
	Day	CM + Cell			CM + DF + Cell			BRADFORD + ddi	ddi							Day	CM + Cell	Dilution	CM + Cell	Dilution	CM + DF + Cell	Dilution	CM + DF + Cell	Dilution
	0	0.211	0.218	0.219	0.188	0.194	0.197	0.181	0.03						y=0.1125x + 0.0556	0	0.359111	2.5	0.359111	2.5	0.323556	2.5	0.314667	2.5
	3	0.204	0.214	0.211	0.185	0.196	0.195	0.183	0.032							3	0.323556	2.5	0.323556	2.5	0.323556	2.5	0.350222	2.5
	6	0.214	0.225	0.218	0.201	0.201	0.203	0.18	0.03							6	0.705778	2.5	0.705778	2.5	0.696889	2.5	0.679111	2.5
	9	0.205	0.212	0.211	0.19	0.192	0.201		0.0306667							9	1.15022	2.5	1.17689	2.5	1.51467	2.5	1.50578	2.5
	12	0.207	0.212	0.21	0.203	0.204	0.208									12	0.368	5	0.350222	5	2.19911	5	2.208	5
	15	0.193	0.191	0.207	0.199	0.199	0.203									15	0.288	5	0.296889	5	2.63467	5	2.67022	5
	18	0.196	0.207	0.203	0.223	0.221	0.216									18	0.954667	5	0.892444	5	2.86578	5	2.848	5
	21	0.19	0.195	0.199	0.178	0.188	0.19									21	0.776889	5	0.785778	5	2.41244	5	2.448	5
minus blank ddi	Absorbance 450														Actual sGAG amount per well		CM + Cell		CM + DF + Cell
	Day	CM + Cell			CM + DF + Cell			BRADFORD + buffer	bradford							Day	1	2	1	2
	0	0.288	0.298	0.299	0.259	0.268	0.265	0.282	0.001							0	0.897778	0.897778	0.808889	0.786667
	3	0.283	0.29	0.291	0.249	0.261	0.259	0.28	-0.002							3	0.808889	0.808889	0.808889	0.875556
	6	0.291	0.307	0.298	0.268	0.274	0.268	0.278	0.001							6	1.76444	1.76444	1.74222	1.69778
	9	0.283	0.29	0.293	0.256	0.258	0.261									9	2.87556	2.94222	3.78667	3.76444
	12	0.294	0.304	0.303	0.274	0.272	0.268									12	1.84	1.75111	10.9956	11.04
	15	0.284	0.296	0.298	0.262	0.264	0.26									15	1.44	1.48444	13.1733	13.3511
	18	0.306	0.319	0.31	0.296	0.298	0.282									18	4.77333	4.46222	14.3289	14.24
	21	0.29	0.295	0.302	0.267	0.267	0.257									21	3.88444	3.92889	12.0622	12.24
	Absorbance 595														Average sGAG amount per well		Average
	Day	CM + Cell			CM + DF + Cell			BRADFORD + buffer	bradford							Day	CM + Cell	CM + DF + Cell
	0	0.180333	0.187333	0.188333	0.157333	0.163333	0.166333	0.150333	-0.000666667							0	0.897778	0.797778
	3	0.173333	0.183333	0.180333	0.154333	0.165333	0.164333	0.152333	0.00133333							3	0.808889	0.842222
	6	0.183333	0.194333	0.187333	0.170333	0.170333	0.172333	0.149333	-0.000666667							6	1.76444	1.72
	9	0.174333	0.181333	0.180333	0.159333	0.161333	0.170333									9	2.90889	3.77556
	12	0.176333	0.181333	0.179333	0.172333	0.173333	0.177333									12	1.79556	11.0178
	15	0.162333	0.160333	0.176333	0.168333	0.168333	0.172333									15	1.46222	13.2622
	18	0.165333	0.176333	0.172333	0.192333	0.190333	0.185333									18	4.61778	14.2844
	21	0.159333	0.164333	0.168333	0.147333	0.157333	0.159333									21	3.90667	12.1511
595/450	Day	CM + Cell			CM + DF + Cell			BRADFORD + ddi	bradford
	0	0.626157	0.628635	0.629877	0.607465	0.609453	0.627673	0.533097	-0.666667
	3	0.612485	0.632184	0.619702	0.619813	0.633461	0.634492	0.544048	-0.666667
	6	0.630011	0.633008	0.628635	0.635572	0.621655	0.643035	0.53717	-0.666667
	9	0.616019	0.625287	0.615472	0.622396	0.625323	0.652618
	12	0.599773	0.596491	0.591859	0.628954	0.637255	0.661692
	15	0.571596	0.541667	0.591723	0.642494	0.637626	0.662821
	18	0.540305	0.552769	0.555914	0.649775	0.638702	0.65721
	21	0.549425	0.557062	0.557395	0.55181	0.589263	0.619974
Actual protein amount, µg (y=0.4293x+0.4051)	Day	CM + Cell			CM + DF + Cell			BRADFORD + ddi	*refer BSA standard curve
	0	0.514925	0.520697	0.52359	0.471383	0.476014	0.518456	0.298153
	3	0.483078	0.528963	0.499889	0.500146	0.531938	0.534339	0.323661
	6	0.523903	0.530882	0.520697	0.536856	0.504436	0.554239	0.307641
	9	0.491309	0.512899	0.490035	0.506163	0.512982	0.576562	0.309818	Average bradford + PER
	12	0.453467	0.445822	0.435032	0.521439	0.540775	0.597698
	15	0.387832	0.318115	0.434714	0.552978	0.54164	0.600327
	18	0.314943	0.343976	0.351302	0.569939	0.544147	0.587259
	21	0.336187	0.353977	0.354752	0.341743	0.428985	0.500522
Actual protein amount, µg (minus Bradford + PER)	Day	CM + Cell			CM + DF + Cell
	0	0.205107	0.210879	0.213772	0.161565	0.166196	0.208637
	3	0.17326	0.219145	0.19007	0.190328	0.22212	0.224521
	6	0.214085	0.221064	0.210879	0.227038	0.194618	0.244421
	9	0.181491	0.20308	0.180217	0.196345	0.203163	0.266744
	12	0.143649	0.136003	0.125214	0.211621	0.230957	0.287879
	15	0.0780138	0.0082966	0.124896	0.24316	0.231822	0.290509
	18	0.00512479	0.0341582	0.0414839	0.260121	0.234329	0.277441
	21	0.0263693	0.0441584	0.0449341	0.0319248	0.119167	0.190704
Actual amount of protein per well, µg	Day	CM + Cell						CM + DF + Cell
		Reading1	Dilution1	Reading2	Dilution2	Reading3	Dilution3	Reading1	Dilution1	Reading2	Dilution2	Reading3	Dilution3
	0	64.3657	125	65.0872	125	65.4488	125	58.9228	125	59.5017	125	64.8069	125
	3	60.3847	125	66.1204	125	62.4861	125	62.5182	125	66.4923	125	66.7923	125
	6	65.4878	125	66.3602	125	65.0872	125	67.107	125	63.0545	125	69.2799	125
	9	61.4136	125	64.1123	125	61.2544	125	63.2704	125	64.1227	125	72.0703	125
	12	56.6833	125	55.7277	125	54.379	125	65.1799	125	67.5969	125	74.7122	125
	15	48.479	125	39.7643	125	54.3392	125	69.1223	125	67.7051	125	75.0409	125
	18	39.3679	125	42.9971	125	43.9128	125	71.2424	125	68.0184	125	73.4074	125
	21	42.0234	125	44.2471	125	44.344	125	42.7179	125	53.6232	125	62.5652	125
		Cell			Cell + DF
Actual protein amount, µg to mg	Day	1	2	3	1	2	3
	0	0.0643657	0.0650872	0.0654488	0.0589228	0.0595017	0.0648069
	3	0.0603847	0.0661204	0.0624861	0.0625182	0.0664923	0.0667923
	6	0.0654878	0.0663602	0.0650872	0.067107	0.0630545	0.0692799
	9	0.0614136	0.0641123	0.0612544	0.0632704	0.0641227	0.0720703
	12	0.0566833	0.0557277	0.054379	0.0651799	0.0675969	0.0747122
	15	0.048479	0.0397643	0.0543392	0.0691223	0.0677051	0.0750409
	18	0.0393679	0.0429971	0.0439128	0.0712424	0.0680184	0.0734074
	21	0.0420234	0.0442471	0.044344	0.0427179	0.0536232	0.0625652
		Average
Average protein per well, mg	Day	Cell	Cell + DF
	0	0.0649672	0.0610772
	3	0.0629971	0.0652676
	6	0.0656451	0.0664805
	9	0.0622601	0.0664878
	12	0.0555967	0.069163
	15	0.0475275	0.0706228
	18	0.0420926	0.0708894
	21	0.0435382	0.0529688
		Average
sGAG/mg protein	Day	Cell	Cell + DF
	0	13.8189	13.0618
	3	12.8401	12.9041
	6	26.8785	25.8723
	9	46.7216	56.7857
	12	32.2961	159.302
	15	30.7658	187.79
	18	109.705	201.503
	21	89.7297	229.401

## Sheet: Assay n2
BRADFORD															sGAG
READING	Absorbance 450														READING	Absorbance 655
	Day	CM + Cell			CM + DF + Cell			BRADFORD + ddi	ddi							Day	CM + Cell		CM + DF + Cell
	0	0.33	0.326	0.333	0.295	0.292	0.289	0.312	0.031							0	0.088	0.088	0.063	0.063
	3	0.327	0.325	0.326	0.29	0.285	0.281	0.31	0.028							3	0.101	0.102	0.129	0.13
	6	0.338	0.33	0.307	0.299	0.297	0.292	0.308	0.031							6	0.12	0.121	0.136	0.134
	9	0.328	0.328	0.327	0.285	0.3	0.288		0.03							9	0.153	0.153	0.235	0.234
	12	0.339	0.335	0.328	0.301	0.299	0.294									12	0.094	0.092	0.281	0.277
	15	0.331	0.329	0.329	0.291	0.292	0.292									15	0.107	0.106	0.327	0.323
	18	0.344	0.345	0.346	0.311	0.308	0.305									18	0.152	0.154	0.386	0.384
	21	0.308	0.317	0.305	0.297	0.286	0.286									21	0.15	0.151	0.323	0.322
	Absorbance 595														Diluted protein concentration (y=.4904x)		Replicate 1		Replicate 2		Replicate 1		Replicate 2
	Day	CM + Cell			CM + DF + Cell			BRADFORD + ddi	ddi							Day	CM + Cell	Dilution	CM + Cell	Dilution	CM + DF + Cell	Dilution	CM + DF + Cell	Dilution
	0	0.217	0.216	0.221	0.195	0.198	0.198	0.181	0.03						y=0.1125x + 0.0556	0	0.288	2.5	0.288	2.5	0.0657778	2.5	0.0657778	2.5
	3	0.214	0.212	0.212	0.196	0.186	0.194	0.183	0.032							3	0.403556	2.5	0.412444	2.5	0.652444	2.5	0.661333	2.5
	6	0.219	0.219	0.237	0.201	0.199	0.197	0.18	0.03							6	0.572444	2.5	0.581333	2.5	0.714667	2.5	0.696889	2.5
	9	0.211	0.215	0.216	0.193	0.201	0.198		0.0306667							9	0.865778	2.5	0.865778	2.5	1.59467	2.5	1.58578	2.5
	12	0.216	0.214	0.209	0.206	0.204	0.203									12	0.341333	5	0.323556	5	2.00356	5	1.968	5
	15	0.194	0.206	0.199	0.195	0.198	0.203									15	0.456889	5	0.448	5	2.41244	5	2.37689	5
	18	0.201	0.204	0.205	0.212	0.208	0.207									18	0.856889	5	0.874667	5	2.93689	5	2.91911	5
	21	0.182	0.19	0.182	0.196	0.193	0.19									21	0.839111	5	0.848	5	2.37689	5	2.368	5
minus blank ddi	Absorbance 450														Actual sGAG amount per well		CM + Cell		CM + DF + Cell
	Day	CM + Cell			CM + DF + Cell			BRADFORD + buffer	bradford							Day	1	2	1	2
	0	0.3	0.296	0.303	0.265	0.262	0.259	0.282	0.001							0	0.72	0.72	0.164444	0.164444
	3	0.297	0.295	0.296	0.26	0.255	0.251	0.28	-0.002							3	1.00889	1.03111	1.63111	1.65333
	6	0.308	0.3	0.277	0.269	0.267	0.262	0.278	0.001							6	1.43111	1.45333	1.78667	1.74222
	9	0.298	0.298	0.297	0.255	0.27	0.258									9	2.16444	2.16444	3.98667	3.96444
	12	0.309	0.305	0.298	0.271	0.269	0.264									12	1.70667	1.61778	10.0178	9.84
	15	0.301	0.299	0.299	0.261	0.262	0.262									15	2.28444	2.24	12.0622	11.8844
	18	0.314	0.315	0.316	0.281	0.278	0.275									18	4.28444	4.37333	14.6844	14.5956
	21	0.278	0.287	0.275	0.267	0.256	0.256									21	4.19556	4.24	11.8844	11.84
	Absorbance 595														Average sGAG amount per well		Average
	Day	CM + Cell			CM + DF + Cell			BRADFORD + buffer	bradford							Day	CM + Cell	CM + DF + Cell
	0	0.186333	0.185333	0.190333	0.164333	0.167333	0.167333	0.150333	-0.000666667							0	0.72	0.164444
	3	0.183333	0.181333	0.181333	0.165333	0.155333	0.163333	0.152333	0.00133333							3	1.02	1.64222
	6	0.188333	0.188333	0.206333	0.170333	0.168333	0.166333	0.149333	-0.000666667							6	1.44222	1.76444
	9	0.180333	0.184333	0.185333	0.162333	0.170333	0.167333									9	2.16444	3.97556
	12	0.185333	0.183333	0.178333	0.175333	0.173333	0.172333									12	1.66222	9.92889
	15	0.163333	0.175333	0.168333	0.164333	0.167333	0.172333									15	2.26222	11.9733
	18	0.170333	0.173333	0.174333	0.181333	0.177333	0.176333									18	4.32889	14.64
	21	0.151333	0.159333	0.151333	0.165333	0.162333	0.159333									21	4.21778	11.8622
595/450	Day	CM + Cell			CM + DF + Cell			BRADFORD + ddi	bradford
	0	0.621111	0.626126	0.628163	0.620126	0.638677	0.646075	0.533097	-0.666667
	3	0.617284	0.614689	0.612613	0.635897	0.60915	0.65073	0.544048	-0.666667
	6	0.611472	0.627778	0.744886	0.633209	0.630462	0.63486	0.53717	-0.666667
	9	0.605145	0.618568	0.624018	0.636601	0.630864	0.648579
	12	0.599784	0.601093	0.598434	0.646986	0.644362	0.652778
	15	0.542636	0.586399	0.562988	0.62963	0.638677	0.657761
	18	0.542463	0.550265	0.551688	0.645314	0.63789	0.641212
	21	0.544365	0.555168	0.550303	0.619226	0.634115	0.622396
Actual protein amount, µg (y=0.4293x+0.4051)	Day	CM + Cell			CM + DF + Cell			BRADFORD + ddi	*refer BSA standard curve
	0	0.503171	0.514852	0.519597	0.500875	0.544088	0.56132	0.298153
	3	0.494256	0.488212	0.483374	0.537613	0.475309	0.572165	0.323661
	6	0.480717	0.5187	0.791488	0.531352	0.524952	0.535197	0.307641
	9	0.46598	0.497247	0.509942	0.539253	0.525889	0.567153	0.309818	Average bradford + PER
	12	0.453492	0.456541	0.450347	0.563444	0.55733	0.576934
	15	0.320372	0.422313	0.367779	0.523013	0.544088	0.588541
	18	0.319969	0.338142	0.341458	0.559549	0.542254	0.549993
	21	0.324399	0.349565	0.338232	0.498779	0.53346	0.506163
Actual protein amount, µg (minus Bradford + PER)	Day	CM + Cell			CM + DF + Cell
	0	0.193352	0.205034	0.209778	0.191057	0.23427	0.251502
	3	0.184437	0.178393	0.173556	0.227795	0.165491	0.262347
	6	0.170899	0.208882	0.48167	0.221534	0.215134	0.225379
	9	0.156162	0.187429	0.200124	0.229435	0.216071	0.257335
	12	0.143674	0.146722	0.140529	0.253626	0.247512	0.267116
	15	0.0105537	0.112495	0.0579613	0.213195	0.23427	0.278723
	18	0.0101512	0.0283243	0.0316395	0.249731	0.232436	0.240175
	21	0.0145809	0.0397472	0.0284139	0.188961	0.223642	0.196345
Actual amount of protein per well, µg	Day	CM + Cell						CM + DF + Cell
		Reading1	Dilution1	Reading2	Dilution2	Reading3	Dilution3	Reading1	Dilution1	Reading2	Dilution2	Reading3	Dilution3
	0	62.8963	125	64.3565	125	64.9496	125	62.6094	125	68.011	125	70.165	125
	3	61.782	125	61.0265	125	60.4218	125	67.2017	125	59.4137	125	71.5206	125
	6	60.0896	125	64.8375	125	98.936	125	66.419	125	65.619	125	66.8996	125
	9	58.2476	125	62.1559	125	63.7427	125	67.4066	125	65.7361	125	70.8941	125
	12	56.6865	125	57.0676	125	56.2934	125	70.4305	125	69.6663	125	72.1168	125
	15	40.0465	125	52.7892	125	45.9724	125	65.3767	125	68.011	125	73.5677	125
	18	39.9962	125	42.2678	125	42.6822	125	69.9436	125	67.7818	125	68.7492	125
	21	40.5499	125	43.6957	125	42.279	125	62.3474	125	66.6826	125	63.2704	125
		Cell			Cell + DF
Actual protein amount, µg to mg	Day	1	2	3	1	2	3
	0	0.0628963	0.0643565	0.0649496	0.0626094	0.068011	0.070165
	3	0.061782	0.0610265	0.0604218	0.0672017	0.0594137	0.0715206
	6	0.0600896	0.0648375	0.098936	0.066419	0.065619	0.0668996
	9	0.0582476	0.0621559	0.0637427	0.0674066	0.0657361	0.0708941
	12	0.0566865	0.0570676	0.0562934	0.0704305	0.0696663	0.0721168
	15	0.0400465	0.0527892	0.0459724	0.0653767	0.068011	0.0735677
	18	0.0399962	0.0422678	0.0426822	0.0699436	0.0677818	0.0687492
	21	0.0405499	0.0436957	0.042279	0.0623474	0.0666826	0.0632704
		Average
Average protein per well, mg	Day	Cell	Cell + DF
	0	0.0640675	0.0669285
	3	0.0610767	0.0660453
	6	0.074621	0.0663125
	9	0.0613821	0.0680123
	12	0.0566825	0.0707378
	15	0.0462694	0.0689851
	18	0.0416487	0.0688248
	21	0.0421749	0.0641001
		Average
sGAG/mg protein	Day	Cell	Cell + DF
	0	11.2382	2.45702
	3	16.7003	24.8651
	6	19.3273	26.608
	9	35.2618	58.4535
	12	29.3251	140.362
	15	48.8924	173.564
	18	103.938	212.714
	21	100.007	185.058

## Sheet: Assay n3
BRADFORD															sGAG
READING	Absorbance 450														READING	Absorbance 655
	Day	CM + Cell			CM + DF + Cell			BRADFORD + ddi	ddi							Day	CM + Cell		CM + DF + Cell
	0	0.333	0.328	0.333	0.308	0.311	0.305	0.312	0.031							0	0.083	0.079	0.06	0.062
	3	0.319	0.317	0.321	0.301	0.298	0.299	0.31	0.028							3	0.091	0.091	0.102	0.101
	6	0.327	0.319	0.328	0.307	0.308	0.305	0.308	0.031							6	0.102	0.101	0.113	0.112
	9	0.326	0.316	0.322	0.308	0.302	0.302		0.03							9	0.224	0.224	0.19	0.191
	12	0.338	0.324	0.332	0.306	0.306	0.306									12	0.093	0.092	0.252	0.253
	15	0.325	0.319	0.323	0.306	0.3	0.296									15	0.088	0.088	0.356	0.355
	18	0.337	0.33	0.323	0.316	0.324	0.314									18	0.155	0.155	0.376	0.374
	21	0.328	0.322	0.324	0.301	0.305	0.305									21	0.157	0.157	0.371	0.37
	Absorbance 595														Diluted protein concentration (y=.4904x)		Replicate 1		Replicate 2		Replicate 1		Replicate 2
	Day	CM + Cell			CM + DF + Cell			BRADFORD + ddi	ddi							Day	CM + Cell	Dilution	CM + Cell	Dilution	CM + DF + Cell	Dilution	CM + DF + Cell	Dilution
	0	0.215	0.212	0.212	0.198	0.199	0.199	0.181	0.03						y=0.1125x + 0.0556	0	0.243556	2.5	0.208	2.5	0.0391111	2.5	0.0568889	2.5
	3	0.207	0.201	0.2	0.194	0.195	0.196	0.183	0.032							3	0.314667	2.5	0.314667	2.5	0.412444	2.5	0.403556	2.5
	6	0.215	0.204	0.213	0.201	0.206	0.201	0.18	0.03							6	0.412444	2.5	0.403556	2.5	0.510222	2.5	0.501333	2.5
	9	0.21	0.209	0.208	0.208	0.203	0.203		0.0306667							9	1.49689	2.5	1.49689	2.5	1.19467	2.5	1.20356	2.5
	12	0.211	0.203	0.205	0.204	0.202	0.203									12	0.332444	5	0.323556	5	1.74578	5	1.75467	5
	15	0.201	0.194	0.195	0.205	0.202	0.198									15	0.288	5	0.288	5	2.67022	5	2.66133	5
	18	0.2	0.195	0.194	0.212	0.222	0.206									18	0.883556	5	0.883556	5	2.848	5	2.83022	5
	21	0.193	0.19	0.189	0.186	0.195	0.195									21	0.901333	5	0.901333	5	2.80356	5	2.79467	5
minus blank ddi	Absorbance 450														Actual sGAG amount per well		CM + Cell		CM + DF + Cell
	Day	CM + Cell			CM + DF + Cell			BRADFORD + buffer	bradford							Day	1	2	1	2
	0	0.303	0.298	0.303	0.278	0.281	0.275	0.282	0.001							0	0.608889	0.52	0.0977778	0.142222
	3	0.289	0.287	0.291	0.271	0.268	0.269	0.28	-0.002							3	0.786667	0.786667	1.03111	1.00889
	6	0.297	0.289	0.298	0.277	0.278	0.275	0.278	0.001							6	1.03111	1.00889	1.27556	1.25333
	9	0.296	0.286	0.292	0.278	0.272	0.272									9	3.74222	3.74222	2.98667	3.00889
	12	0.308	0.294	0.302	0.276	0.276	0.276									12	1.66222	1.61778	8.72889	8.77333
	15	0.295	0.289	0.293	0.276	0.27	0.266									15	1.44	1.44	13.3511	13.3067
	18	0.307	0.3	0.293	0.286	0.294	0.284									18	4.41778	4.41778	14.24	14.1511
	21	0.298	0.292	0.294	0.271	0.275	0.275									21	4.50667	4.50667	14.0178	13.9733
	Absorbance 595														Average sGAG amount per well		Average
	Day	CM + Cell			CM + DF + Cell			BRADFORD + buffer	bradford							Day	CM + Cell	CM + DF + Cell
	0	0.184333	0.181333	0.181333	0.167333	0.168333	0.168333	0.150333	-0.000666667							0	0.564444	0.12
	3	0.176333	0.170333	0.169333	0.163333	0.164333	0.165333	0.152333	0.00133333							3	0.786667	1.02
	6	0.184333	0.173333	0.182333	0.170333	0.175333	0.170333	0.149333	-0.000666667							6	1.02	1.26444
	9	0.179333	0.178333	0.177333	0.177333	0.172333	0.172333									9	3.74222	2.99778
	12	0.180333	0.172333	0.174333	0.173333	0.171333	0.172333									12	1.64	8.75111
	15	0.170333	0.163333	0.164333	0.174333	0.171333	0.167333									15	1.44	13.3289
	18	0.169333	0.164333	0.163333	0.181333	0.191333	0.175333									18	4.41778	14.1956
	21	0.162333	0.159333	0.158333	0.155333	0.164333	0.164333									21	4.50667	13.9956
595/450	Day	CM + Cell			CM + DF + Cell			BRADFORD + ddi	bradford
	0	0.608361	0.608501	0.59846	0.601918	0.599051	0.612121	0.533097	-0.666667
	3	0.61015	0.593496	0.581901	0.602706	0.613184	0.614622	0.544048	-0.666667
	6	0.620651	0.599769	0.611857	0.614922	0.630695	0.619394	0.53717	-0.666667
	9	0.605856	0.623543	0.607306	0.63789	0.633578	0.633578
	12	0.585498	0.586168	0.577263	0.628019	0.620773	0.624396
	15	0.577401	0.565167	0.560865	0.631643	0.634568	0.629073
	18	0.551574	0.547778	0.557452	0.634033	0.650794	0.617371
	21	0.544743	0.545662	0.538549	0.573186	0.597576	0.597576
Actual protein amount, µg (y=0.4293x+0.4051)	Day	CM + Cell			CM + DF + Cell			BRADFORD + ddi	*refer BSA standard curve
	0	0.47347	0.473797	0.450407	0.458464	0.451784	0.48223	0.298153
	3	0.477638	0.438844	0.411837	0.460298	0.484706	0.488055	0.323661
	6	0.502099	0.453458	0.481614	0.488753	0.525496	0.499171	0.307641
	9	0.467635	0.508836	0.471013	0.542254	0.532212	0.532212	0.309818	Average bradford + PER
	12	0.420214	0.421775	0.401031	0.519262	0.502383	0.510823
	15	0.401354	0.372856	0.362834	0.527702	0.534516	0.521716
	18	0.341194	0.33235	0.354884	0.53327	0.572312	0.494458
	21	0.32528	0.327422	0.310852	0.391534	0.448348	0.448348
Actual protein amount, µg (minus Bradford + PER)	Day	CM + Cell			CM + DF + Cell
	0	0.163652	0.163979	0.140589	0.148646	0.141966	0.172412
	3	0.16782	0.129026	0.102019	0.15048	0.174887	0.178237
	6	0.19228	0.143639	0.171796	0.178935	0.215678	0.189352
	9	0.157817	0.199017	0.161195	0.232436	0.222393	0.222393
	12	0.110396	0.111956	0.091213	0.209444	0.192565	0.201004
	15	0.0915355	0.0630382	0.0530158	0.217884	0.224698	0.211898
	18	0.0313754	0.0225317	0.0450657	0.223451	0.262494	0.18464
	21	0.0154619	0.0176035	0.00103381	0.0817163	0.13853	0.13853
Actual amount of protein per well, µg	Day	CM + Cell						CM + DF + Cell
		Reading1	Dilution1	Reading2	Dilution2	Reading3	Dilution3	Reading1	Dilution1	Reading2	Dilution2	Reading3	Dilution3
	0	59.1838	125	59.2246	125	56.3009	125	57.308	125	56.473	125	60.2787	125
	3	59.7047	125	54.8556	125	51.4796	125	57.5373	125	60.5882	125	61.0069	125
	6	62.7623	125	56.6822	125	60.2017	125	61.0942	125	65.687	125	62.3963	125
	9	58.4544	125	63.6045	125	58.8766	125	67.7818	125	66.5264	125	66.5264	125
	12	52.5267	125	52.7218	125	50.1289	125	64.9078	125	62.7979	125	63.8528	125
	15	50.1692	125	46.607	125	45.3542	125	65.9628	125	66.8146	125	65.2145	125
	18	42.6492	125	41.5437	125	44.3605	125	66.6587	125	71.539	125	61.8073	125
	21	40.66	125	40.9277	125	38.8565	125	48.9418	125	56.0435	125	56.0435	125
		Cell			Cell + DF
Actual protein amount, µg to mg	Day	1	2	3	1	2	3
	0	0.0591838	0.0592246	0.0563009	0.057308	0.056473	0.0602787
	3	0.0597047	0.0548556	0.0514796	0.0575373	0.0605882	0.0610069
	6	0.0627623	0.0566822	0.0602017	0.0610942	0.065687	0.0623963
	9	0.0584544	0.0636045	0.0588766	0.0677818	0.0665264	0.0665264
	12	0.0525267	0.0527218	0.0501289	0.0649078	0.0627979	0.0638528
	15	0.0501692	0.046607	0.0453542	0.0659628	0.0668146	0.0652145
	18	0.0426492	0.0415437	0.0443605	0.0666587	0.071539	0.0618073
	21	0.04066	0.0409277	0.0388565	0.0489418	0.0560435	0.0560435
		Average
Average protein per well, mg	Day	Cell	Cell + DF
	0	0.0582365	0.0580199
	3	0.0553466	0.0597108
	6	0.0598821	0.0630592
	9	0.0603118	0.0669449
	12	0.0517925	0.0638528
	15	0.0473768	0.0659973
	18	0.0428511	0.0666683
	21	0.0401481	0.0536763
		Average
sGAG/mg protein	Day	Cell	Cell + DF
	0	9.69229	2.06826
	3	14.2135	17.0823
	6	17.0335	20.0517
	9	62.0479	44.7798
	12	31.6648	137.051
	15	30.3946	201.961
	18	103.096	212.928
	21	112.251	260.74

## Sheet: AVERAGE
		N1	N2	N3	N1	N2	N3
sGAG/mg protein	Day	Cell			DF + Cell
	0	13.8189	11.2382	9.69229	13.0618	2.45702	2.06826
	3	12.8401	16.7003	14.2135	12.9041	24.8651	17.0823
	6	26.8785	19.3273	17.0335	25.8723	26.608	20.0517
	9	46.7216	35.2618	62.0479	56.7857	58.4535	44.7798
	12	32.2961	29.3251	31.6648	159.302	140.362	137.051
	15	30.7658	48.8924	30.3946	187.79	173.564	201.961
	18	109.705	103.938	103.096	201.503	212.714	212.928
	21	89.7297	100.007	112.251	229.401	185.058	260.74
Average	Day	Cell	STD	DF + Cell	STD	t.TEST	Annotation
	0	11.5831	2.08484	5.86236	6.23793	0.0748686
	3	14.5846	1.95668	18.2839	6.07032	0.129825
	6	21.0798	5.15119	24.1773	3.59177	0.16238
	9	48.0104	13.4395	53.3397	7.45982	0.349253
	12	31.0954	1.56521	145.572	12.0052	0.00159126	*
	15	36.6843	10.5742	187.772	14.1986	0.00415469	*
	18	105.58	3.59755	209.048	6.53515	0.00158707	*
	21	100.663	11.275	225.066	38.027	0.0122521	*
