# Supplementary material for: Impact of isolation method on doubling time and the quality of chondrocyte and osteoblast differentiated from murine dental pulp stem cells
Source: PeerJ. 2017 Jun 14;5:e3180. doi: 10.7717/peerj.3180 (PMC5473353; doi:10.7717/peerj.3180)
Supplement: Data S5 [file peerj-05-3180-s005.xlsx]

## Sheet: DPSC-OG
Area: 124.421
Thresholding method: Otsu
Saturation:10
Unit: %
	Day	0			3			6			9			12			15			18			21
	Reading	1	2	3	1	2	3	1	2	3	1	2	3	1	2	3	1	2	3	1	2	3	1	2	3
Differentiated	N1	1.186	1.154	0.738	1.613	1.703	1.67	12.144	7.397	8.441	23.334	19.35	14.41	28.757	35.019	46.013	32.59	65.306	42.153	62.354	77.852	58.96	97.279	89.917	92.717
	N2	1.01	0.683	1.384	1.611	1.198	2.122	8.332	8.077	16.71	21.091	21.074	33.9	58.696	35.635	42.844	74.412	54.606	56.32	73.853	63.449	95.448	100.535	100.038	114.436
	N3	0.89	1.014	0.449	1.435	2.078	1.386	12.95	7.473	9.486	17.518	16.967	27.201	28.788	34.504	42.047	45.645	67.379	66.787	73.009	61.98	79.203	79.203	93.102	92.032
Undifferentiated	N1	1.298	1.038	1.168	0.774	0.674	1.046	1.556	1.326	0.661	1.246	1.214	1.311	1.328	1.606	1.654	0.936	1.246	0.857	1.33	1.819	2.607	3.344	2.487	1.23
	N2	0.473	1.387	1.14	0.847	1.108	1.081	0.954	1.911	2.226	3.267	3.353	2.458	1.178	3.502	7.135	5.03	3.353	2.59	4.158	5.797	5.36	1.145	1.876	1.621
	N3	1.001	0.899	0.991	1.156	0.363	0.831	0.449	1.096	1.319	1.001	1.164	1.24	2.203	1.631	1.107	1.43	1.152	0.95	2.435	2.127	1.22	0.98	2.55	3.902
	Average technicals
	Day	0	3	6	9	12	15	18	21
Differentiated	N1	1.026	1.662	9.32733	19.0313	36.5963	46.683	66.3887	93.3043
	N2	1.02567	1.64367	11.0397	25.355	42.7687	61.7793	77.5833	105.003
	N3	0.784333	1.633	9.96967	20.562	35.113	59.937	71.3973	88.1123
Undifferentiated	N1	1.168	0.831333	1.181	1.257	1.52933	1.013	1.91867	2.35367
	N2	1	1.012	1.697	3.026	3.93833	3.65767	5.105	1.54733
	N3	0.963667	0.783333	0.954667	1.135	1.647	1.17733	1.92733	2.47733
	% differentiated
	Day	0	3	6	9	12	15	18	21
	N1	-0.114129	0.667626	6.54739	14.2856	28.1841	36.706	51.816	73.0991
	N2	0.0206289	0.507685	7.50891	17.9463	31.2089	46.7137	58.2525	83.1497
	N3	-0.144134	0.682897	7.24556	15.6139	26.8974	47.2265	55.8346	68.8268
	Average biologicals
	Day	0	3	6	9	12	15	18	21
	Average biologicals	-0.0792114	0.619402	7.10062	15.9486	28.7635	43.5487	55.301	75.0252
	STD	0.0877561	0.097051	0.496876	1.85315	2.21336	5.93151	3.25125	7.35313
	T.test	0.0112467	0.00126245	0.00419158	0.00187704	0.0248798	0.0123233	0.0152345	#DIV/0!
	Annotation	*	*	*	*	*	*	*	*

## Sheet: DPSC-ED
Area: 124.421
Thresholding method: Otsu
Saturation:10
Unit: %
	Day	0			3			6			9			12			15			18			21
	Reading	1	2	3	1	2	3	1	2	3	1	2	3	1	2	3	1	2	3	1	2	3	1	2	3
Differentiated	N1	0.913	0.794	0.985	1.127	1.132	0.913	8.228	8.125	11.702	47.033	48.817	27.315	74.959	81.137	74.836	99.483	101.33	106.367	112.492	108.623	96.081	113.016	115.637	110.796
	N2	0.813	0.5	0.455	0.567	0.671	0.367	6.37	6.132	4.435	44.464	39.426	35.016	82.661	83.271	80.043	107.138	103.357	104.794	112.184	107.32	95.246	105.974	111.41	118.129
	N3	0.63	1.505	0.883	0.334	0.321	0.171	17.511	7.371	5.122	23.594	29.986	64.335	79.589	102.705	91.022	113.14	117.125	90.181	115.798	115.369	108.521	94.835	109.782	114.007
Undifferentiated	N1	1.071	0.851	0.608	0.296	0.708	1.071	0.243	2.162	0.296	1.202	0.801	2.162	1.708	2.392	1.202	1.013	1.524	1.965	2.055	2.128	1.013	0.634	2.036	2.128
	N2	0.215	0.958	0.534	0.043	0.182	0.043	1.5	1.75	1.589	2.711	3.644	3.578	0.335	1.307	1.295	3.785	3.204	3.582	2.67	3.272	3.308	2.982	3.539	2.257
	N3	0.784	0.992	0.753	0.126	0.426	0.052	0.324	0.943	2.262	1.02	1.515	0.456	1.217	0.767	0.647	0.269	0.55	0.647	1.772	2.907	0.269	0.8	1.524	2.907
	Average technicals
	Day	0	3	6	9	12	15	18	21
Differentiated	N1	0.897333	1.05733	9.35167	41.055	76.9773	102.393	105.732	113.15
	N2	0.589333	0.535	5.64567	39.6353	70.2477	105.096	104.917	111.838
	N3	1.006	0.275333	10.0013	39.305	91.1053	106.815	113.229	106.208
Undifferentiated	N1	0.843333	0.691667	0.900333	1.38833	1.76733	1.50067	1.732	1.59933
	N2	0.569	0.0893333	1.613	3.311	0.979	3.52367	3.08333	2.926
	N3	0.843	0.201333	1.17633	0.997	0.877	0.488667	1.64933	1.74367
	% differentiated
	Day	0	3	6	9	12	15	18	21
	N1	0.043401	0.293895	6.79253	31.881	60.448	81.0897	83.5872	89.6556
	N2	0.0163424	0.358192	3.24115	29.1947	55.6729	81.6363	81.8458	87.5348
	N3	0.131007	0.0594755	7.09285	30.789	72.5186	85.4572	89.6794	83.9604
	Average biologicals
	Day	0	3	6	9	12	15	18	21
	Average biologicals	0.0635834	0.237188	5.70884	30.6216	62.8798	82.7277	85.0374	87.0502
	STD	0.0599373	0.157225	2.14236	1.35096	8.68215	2.37951	4.11325	2.87834
	T.test	0.150194	0.0261694	0.000347962	0.0106034	0.0172118	0.0926129	0.327318	#DIV/0!
	Annotation	*	*	*	*	*

## Sheet: ED vs OG
	Day	0	3	6	9	12	15	18	21
DPSC-ED	N1	0.043401	0.293895	6.79253	31.881	60.448	81.0897	83.5872	89.6556
	N2	0.0163424	0.358192	3.24115	29.1947	55.6729	81.6363	81.8458	87.5348
	N3	0.131007	0.0594755	7.09285	30.789	72.5186	85.4572	89.6794	83.9604
DPSC-OG	N1	-0.114129	0.667626	6.54739	14.2856	28.1841	36.706	51.816	73.0991
	N2	0.0206289	0.507685	7.50891	17.9463	31.2089	46.7137	58.2525	83.1497
	N3	-0.144134	0.682897	7.24556	15.6139	26.8974	47.2265	55.8346	68.8268
	t.test	0.109985	0.0539435	0.218221	0.00775836	0.0156284	0.00248439	0.00544701	0.0443534
	significant (p<0.05)				*	*	*	*	*
